# Supplementary material
Source: PubMed Central journal article supplement (PMC3836669)
Supplement: NIHMS525893-supplement-3.pdf [file NIHMS525893-supplement-3.pdf]

# **Effects of folic acid on overall and site-specific cancer incidence during the randomised trials: meta-analyses of data on 50000 individuals**

## **Contents**

Page 1: Contents list

Page 2: webfigure 1. Screening and selection of included trials

Page 3: webfigure 2. Effects of folic acid on cancer incidence, in pre-specified subgroups

Page 4: webfigure 3. Effects of folic acid on overall first cancer incidence, by percentage reduction in homocysteine or dose of folic acid

Page 5: webtable 1. Selected characteristics at baseline of included trials

Page 6: webtable2. Median plasma levels of folate and homocysteine before and after study treatment in the vascular trials

Page 7: webtable 3. Cancer sub-types by study

Page 8: webtable 4. Effects of folic acid allocation on colorectal cancer incidence, by trial

Page 9: webtable 5. Effects of folic acid allocation on prostate cancer incidence, by trial

Page 10: webtable 6. Effects of folic acid allocation on cancer incidence, by trial

**webfigure 1: Screening and selection of included trials**

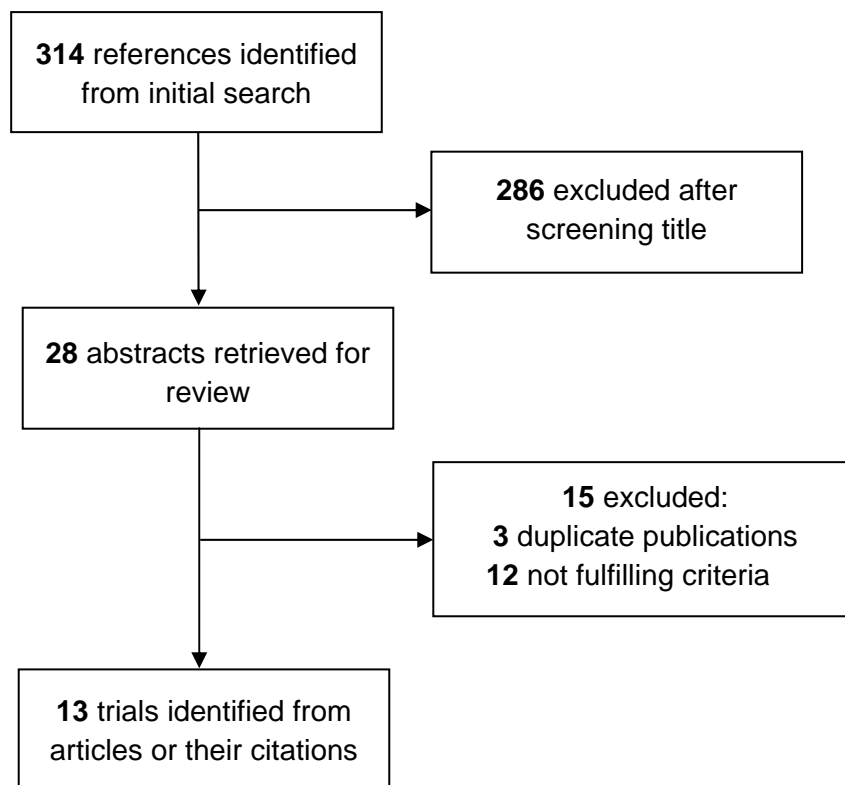

# webfigure 2: Effects of folic acid on cancer incidence, in pre-specified subgroups

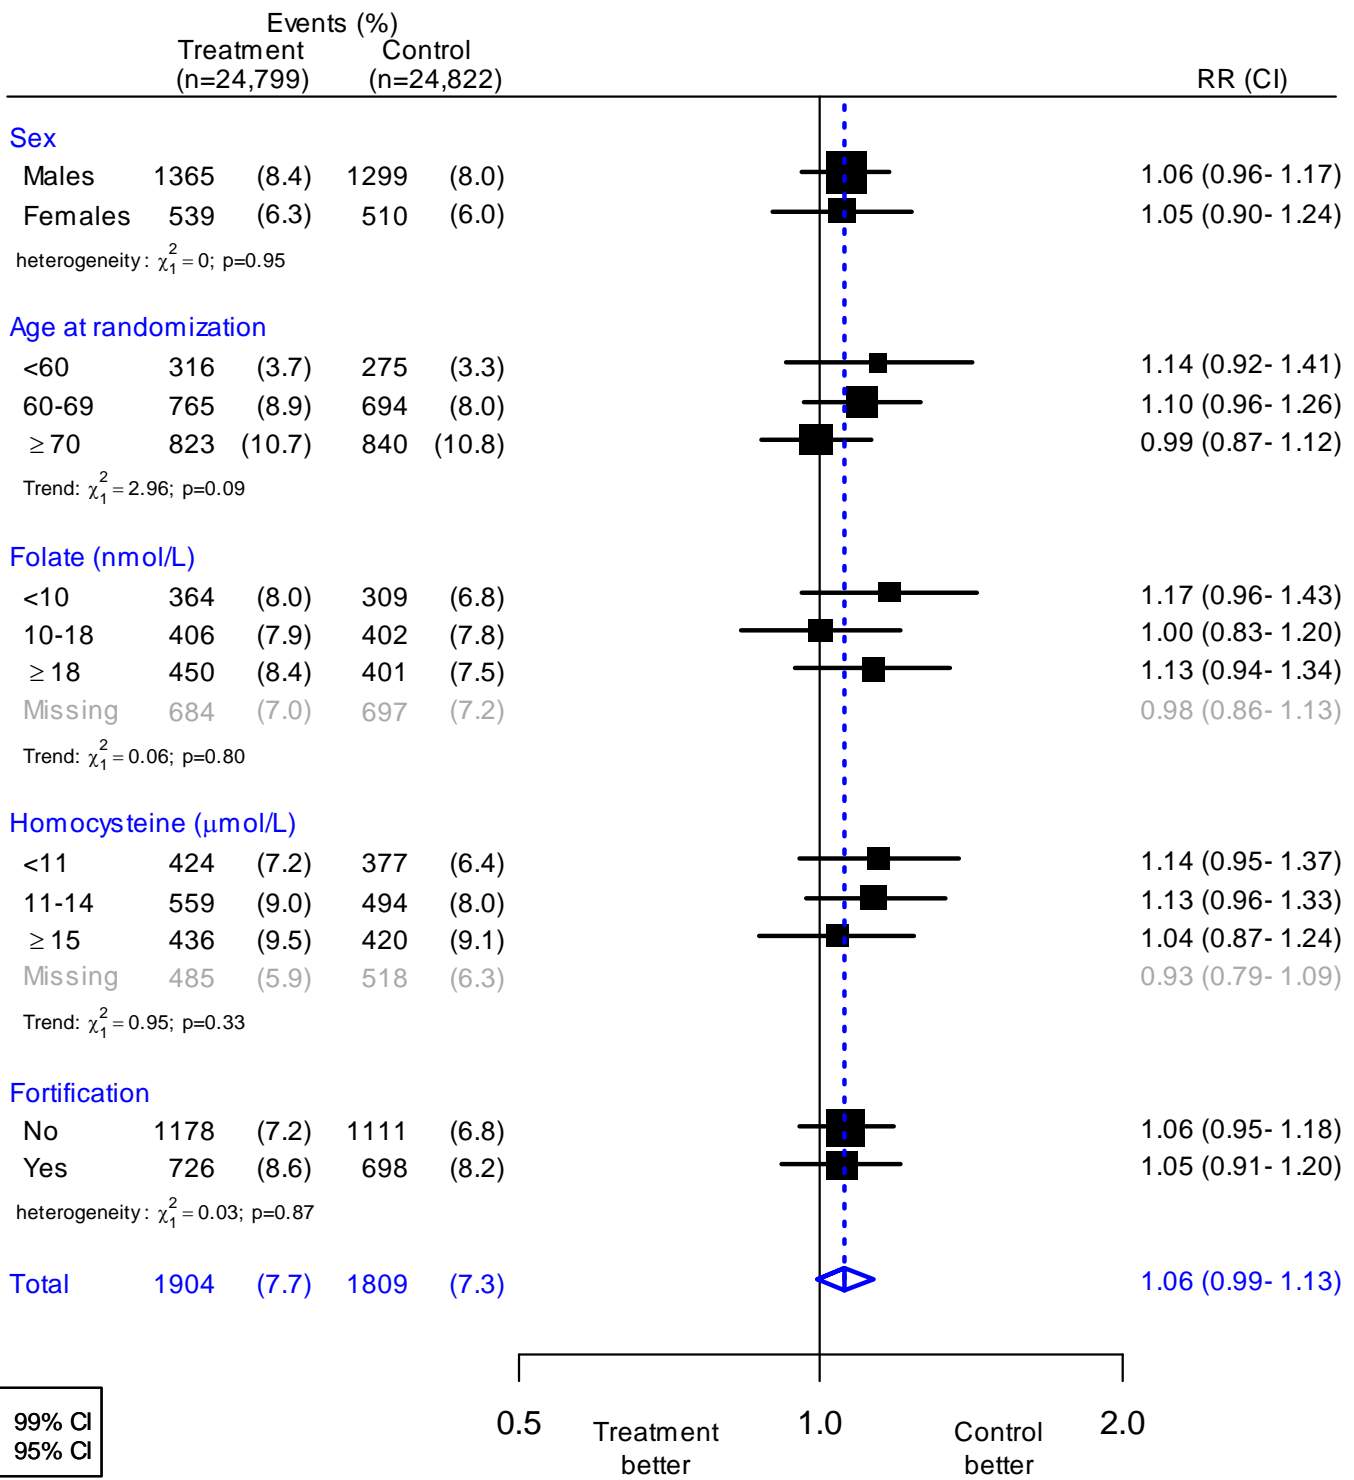

**webfigure 3: Effects of folic acid on overall first cancer incidence, by percentage reduction in homocysteine or dose of folic acid**

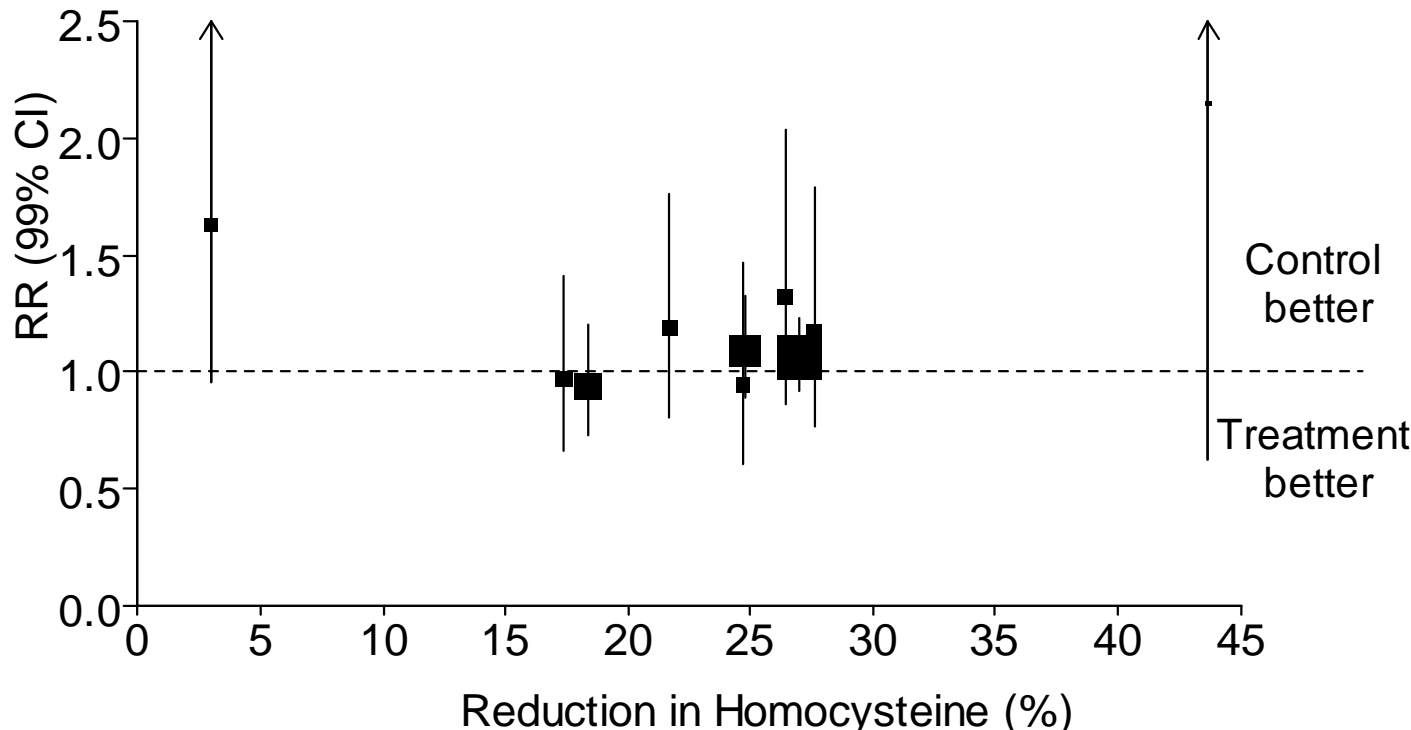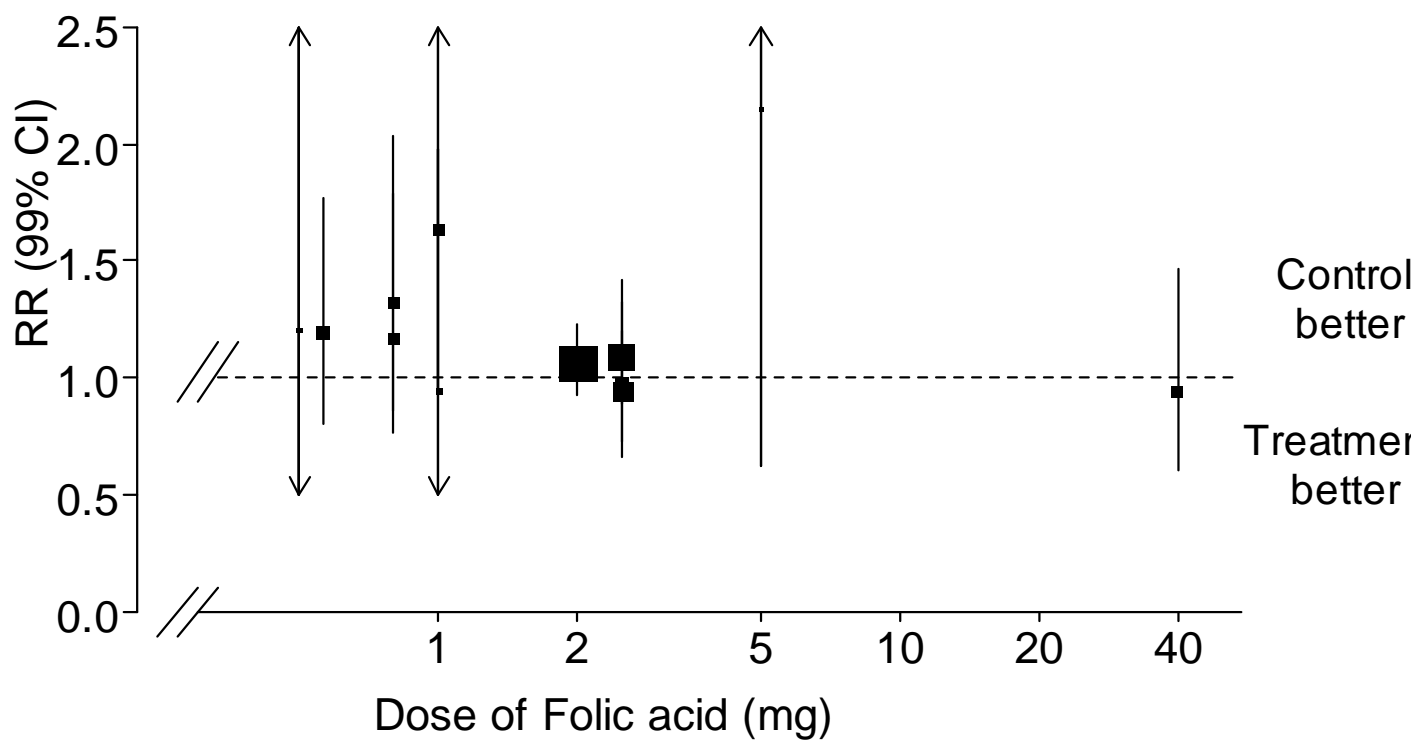

**webtable 1: Selected characteristics at baseline of included trials**

| <b>Trial</b>                     | <b>Number<br/>randomised</b> | <b>Existing<br/>Cancer (%)</b> | <b>Male (%)</b> | <b>Age in years<br/>Mean (SD)</b> | <b>Current<br/>smoker (%)</b> | <b>Current<br/>drinker (%)</b> | <b>Obesity* (%)</b> |
|----------------------------------|------------------------------|--------------------------------|-----------------|-----------------------------------|-------------------------------|--------------------------------|---------------------|
| <b>Colorectal adenoma trials</b> |                              |                                |                 |                                   |                               |                                |                     |
| ukCAP                            | 939                          | 24 (2.6)                       | 56              | 58 (9)                            | 16                            | 66                             | 10                  |
| HARVARD                          | 692                          | 16 (2.3)                       | 40              | 65 (7)                            | 6                             | 67                             | 13                  |
| AFPPS                            | 1021                         | 50 (4.9)                       | 63              | 57 (10)                           | 14                            | 64                             | 23                  |
| <b>Sub-total</b>                 | <b>2652</b>                  |                                | <b>55</b>       | <b>60 (9)</b>                     | <b>13</b>                     | <b>66</b>                      | <b>15</b>           |
| <b>Vascular trials</b>           |                              |                                |                 |                                   |                               |                                |                     |
| VITRO                            | 701                          | 0 (0.0)                        | 51              | 52 (15)                           | 28                            | 55                             | 20                  |
| HOST                             | 2056                         | 172 (8.4)                      | 98              | 66 (12)                           | 19                            | 18                             | 28                  |
| SU-FOL-OM3                       | 2501                         |                                | 79              | 61 (9)                            | 11                            | 81                             | 23                  |
| WENBIT                           | 3090                         | 124 (4.0)                      | 79              | 62 (10)                           | 24                            |                                | 18                  |
| VISP                             | 3680                         | 27 (0.7)                       | 62              | 66 (11)                           | 16                            | 57                             | 31                  |
| NORVIT                           | 3749                         | 202 (5.4)                      | 73              | 63 (12)                           | 46                            | 44                             | 14                  |
| WAFACS                           | 5442                         | 432 (7.9)                      | 0               | 63 (9)                            | 11                            | 45                             | 50                  |
| HOPE-2                           | 5522                         |                                | 71              | 69 (7)                            | 11                            | 41                             | 34                  |
| VITATOPS                         | 8164                         |                                | 63              | 63 (12)                           | 22                            | 28                             | 0                   |
| SEARCH                           | 12064                        | 0 (0.0)                        | 82              | 64 (9)                            | 12                            | 61                             | 28                  |
| <b>Sub-total</b>                 | <b>46969</b>                 |                                | <b>66</b>       | <b>64 (10)</b>                    | <b>18</b>                     | <b>44</b>                      | <b>24</b>           |
| <b>Total</b>                     | <b>49621</b>                 | <b>1047 (3.1)</b>              | <b>65</b>       | <b>64 (10)</b>                    | <b>18</b>                     | <b>46</b>                      | <b>24</b>           |

\* defined as BMI ≥ 30

**webtable 2: Median plasma levels of folate and homocysteine before and after study treatment in the vascular disease trials**

| Trial                | Number with both baseline & follow-up folate data | Folate (nmol/L) |         |                    |         | Percent increase in folate | Number with both baseline & follow-up homocysteine | Homocysteine (µmol/L) |         |                    |         | Percent homocysteine reduction |
|----------------------|---------------------------------------------------|-----------------|---------|--------------------|---------|----------------------------|----------------------------------------------------|-----------------------|---------|--------------------|---------|--------------------------------|
|                      |                                                   | Before          |         | After <sup>1</sup> |         |                            |                                                    | Before                |         | After <sup>1</sup> |         |                                |
|                      |                                                   | Treated         | Control | Treated            | Control |                            |                                                    | Treated               | Control | Treated            | Control |                                |
| <b>Fortified</b>     |                                                   |                 |         |                    |         |                            |                                                    |                       |         |                    |         |                                |
| VISP                 | 2599                                              | 22.9            | 23.2    | 62.9               | 22.6    | 293                        | 3114                                               | 12.3                  | 12.3    | 9.8                | 11.7    | 17                             |
| HOST                 | 1179                                              | 15.7            | 15.5    | 2019.0             | 16.5    | 4788                       | 1844                                               | 22.5                  | 22.2    | 16.5               | 21.6    | 25                             |
| HOPE-2               | 884                                               | 28.8            | 28.9    | 45.3               | 23.2    | 179                        | 897                                                | 11.0                  | 11.0    | 9.0                | 12.0    | 24                             |
| WAFACS               | 300                                               | 19.9            | 20.1    | 88.1               | 35.0    | 206                        | 300                                                | 12.5                  | 12.5    | 9.8                | 11.8    | 18                             |
| VITATOPS             | -                                                 | -               | -       | -                  | -       | -                          | -                                                  | -                     | -       | -                  | -       | -                              |
| <b>Subtotal</b>      | 2399                                              | 22.4            | 22.3    | 69.2               | 22.3    | †1687                      | 6156                                               | 13.2                  | 13.2    | 11.0               | 13.5    | †20                            |
| <b>Non-fortified</b> |                                                   |                 |         |                    |         |                            |                                                    |                       |         |                    |         |                                |
| VISP                 | 36                                                | 17.6            | 13.2    | 65.9               | 12.6    | 502                        | 41                                                 | 13.5                  | 14.0    | 8.7                | 14.4    | 35                             |
| VITRO                | -                                                 | 8.1             | 7.7     | -                  | -       | -                          | 587                                                | 11.1                  | 11.5    | 7.6                | 11.6    | 44                             |
| HOPE-2               | 250                                               | 14.5            | 13.3    | 45.4               | 14.0    | 238                        | 256                                                | 13.0                  | 12.7    | 9.0                | 13.1    | 29                             |
| WENBIT               | 2760                                              | 9.7             | 10.1    | 61.6               | 8.5     | 588                        | 2760                                               | 10.0                  | 10.1    | 7.7                | 10.2    | 26                             |
| NORVIT               | 3316                                              | 8.1             | 8.0     | 62.4               | 7.3     | 656                        | 3374                                               | 12.1                  | 12.1    | 8.9                | 12.4    | 28                             |
| SEARCH               | 1152                                              | 14.0            | 13.8    | 52.4               | 12.5    | 378                        | 393                                                | 12.6                  | 12.5    | 8.8                | 12.5    | 27                             |
| VITATOPS             | -                                                 | 20.7            | 18.9    | -                  | -       | -                          | 923                                                | 12.5                  | 12.8    | 9.6                | 13.0    | 26                             |
| SU-FOL-OM3           | 2043                                              | 15.2            | 15.4    | 37.8               | 15.4    | 232                        | 2114                                               | 13.0                  | 12.8    | 9.7                | 12.2    | 22                             |
| <b>Subtotal</b>      | 12120                                             | 12.2            | 12.1    | 53.5               | 9.8     | †394                       | 10448                                              | 12.2                  | 12.2    | 8.7                | 11.8    | †27                            |
| <b>Total</b>         | 14519                                             | 13.9            | 13.7    | 57.3               | 13.5    | †827                       | 16604                                              | 12.4                  | 12.4    | 9.3                | 12.3    | †25                            |

<sup>1</sup> First available post-randomization

† The values shown are the weighted mean values (with weights equal to the variance of the logrank statistic for cancer events). For calculation of percent homocysteine reduction, the analysis used the average of the first four follow-up values (where present).

## webtable 3: Cancer sub-types by study

| Characteristic         | ukCAP | HARVARD | AFPPS | VITRO | HOST | WENBIT | NORVIT | SU-FOL-OM3 | VISP | VITATOPS | WAFACS | HOPE-2 | SEARCH | Total |
|------------------------|-------|---------|-------|-------|------|--------|--------|------------|------|----------|--------|--------|--------|-------|
| Number randomized      | 939   | 692     | 1021  | 701   | 2056 | 3090   | 3749   | 2501       | 3680 | 8164     | 5442   | 5522   | 12064  | 49621 |
| - Cancer deaths        | 0     | 0       | 14    | .     | 39   | 29     | 50     | 58         | 45   | 181      | 129    | 189    | 510    |       |
| <b>Cancer subtypes</b> |       |         |       |       |      |        |        |            |      |          |        |        |        |       |
| Lip, mouth, pharynx    | 0     | 2       | 0     | 1     | 4    | 2      | 3      | 2          | 4    | 0        | 4      | 7      | 21     | 50    |
| Esophagus              | 2     | 0       | 1     | 0     | 2    | 1      | 1      | 2          | 5    | 0        | 1      | 7      | 33     | 55    |
| Stomach                | 2     | 0       | 4     | 0     | 1    | 7      | 8      | 5          | 1    | 0        | 1      | 15     | 44     | 88    |
| Liver                  | 0     | 0       | 1     | 0     | 3    | 1      | 1      | 6          | 2    | 0        | 4      | 7      | 21     | 46    |
| Pancreas               | 2     | 0       | 4     | 1     | 0    | 5      | 5      | 5          | 2    | 0        | 15     | 16     | 22     | 77    |
| Colorectal             | 10    | 4       | 7     | 4     | 7    | 21     | 17     | 16         | 7    | 38       | 45     | 85     | 168    | 429   |
| Larynx                 | 0     | 0       | 0     | 0     | 1    | 1      | 1      | 0          | 0    | 0        | 0      | 5      | 9      | 17    |
| Lung                   | 5     | 7       | 7     | 2     | 22   | 13     | 24     | 26         | 10   | 59       | 45     | 96     | 209    | 525   |
| Melanoma               | 0     | 5       | 4     | 2     | 0    | 9      | 6      | 7          | 3    | 14       | 7      | 14     | 55     | 126   |
| Breast                 | 4     | 11      | 5     | 2     | 1    | 5      | 4      | 9          | 8    | 25       | 154    | 21     | 48     | 297   |
| Uterus                 | 0     | 2       | 6     | 1     | 0    | 2      | 2      | 1          | 1    | 0        | 28     | 10     | 6      | 59    |
| Ovary                  | 0     | 0       | 1     | 1     | 1    | 0      | 1      | 1          | 0    | 0        | 14     | 7      | 8      | 34    |
| Prostate               | 2     | 11      | 33    | 1     | 14   | 37     | 33     | 50         | 28   | 39       | 0      | 127    | 281    | 656   |
| Kidney                 | 0     | 0       | 5     | 1     | 15   | 5      | 4      | 1          | 1    | 0        | 14     | 19     | 41     | 106   |
| Bladder                | 0     | 3       | 1     | 0     | 6    | 10     | 6      | 18         | 5    | 0        | 9      | 35     | 114    | 207   |
| Brain                  | 0     | 0       | 0     | 1     | 1    | 2      | 2      | 3          | 1    | 9        | 3      | 9      | 17     | 48    |
| Haematological         | 0     | 3       | 10    | 0     | 10   | 15     | 13     | 14         | 4    | 17       | 1      | 33     | 113    | 233   |
| Other site             | 0     | 0       | 0     | 1     | 47   | 5      | 4      | 4          | 6    | 116      | 39     | 137    | 34     | 393   |
| Unspecified/no ICD     | 0     | 1       | 3     | 1     | 2    | 3      | 14     | 1          | 99   | 28       | 30     | 12     | 73     | 267   |
| Any cancer             | 27    | 49      | 92    | 19    | 137  | 144    | 149    | 171        | 187  | 345      | 414    | 662    | 1317   | 3713  |

**webtable 4: Effects of folic acid allocation on colorectal cancer incidence, by trial**

|                                  | Folic acid events  | Control events     | O-E         | Var          | Z-value      | p-value     | RR (95% CI)             |
|----------------------------------|--------------------|--------------------|-------------|--------------|--------------|-------------|-------------------------|
| <b>Colorectal Adenoma trials</b> |                    |                    |             |              |              |             |                         |
| HARVARD                          | 5 / 470            | 5 / 469            | -0.1        | 2.5          | -0.07        | 0.94        | 1.05                    |
| ukCAP                            | 1 / 346            | 3 / 346            | 1.0         | 1.0          | 0.96         | 0.34        | 0.38                    |
| AFPPS                            | 3 / 516            | 4 / 505            | 0.6         | 1.7          | 0.44         | 0.66        | 0.72                    |
| <b>Subtotal</b>                  | <b>9 / 1332</b>    | <b>12 / 1320</b>   | <b>1.4</b>  | <b>5.2</b>   | <b>0.62</b>  | <b>0.53</b> | <b>0.76 (0.32-1.80)</b> |
| <b>Vascular disease trials</b>   |                    |                    |             |              |              |             |                         |
| VITRO                            | 3 / 353            | 1 / 348            | -1.0        | 1.0          | -0.97        | 0.33        | 2.64                    |
| HOST                             | 5 / 1032           | 2 / 1024           | -1.6        | 1.7          | -1.20        | 0.23        | 2.46                    |
| WENBIT                           | 13 / 1540          | 8 / 1550           | -2.9        | 5.2          | -1.30        | 0.21        | 1.73                    |
| NORVIT                           | 9 / 1872           | 8 / 1877           | -0.2        | 4.2          | -0.11        | 0.92        | 1.05                    |
| SU-FOL-OM3                       | 6 / 1242           | 10 / 1259          | 1.9         | 4.0          | 0.96         | 0.34        | 0.62                    |
| VISP                             | 4 / 1827           | 3 / 1853           | -0.5        | 1.7          | -0.37        | 0.71        | 1.32                    |
| VITATOPS                         | 19 / 4088          | 19 / 4074          | 0.1         | 9.5          | 0.02         | 0.98        | 0.99                    |
| WAFACS                           | 20 / 2721          | 25 / 2721          | 2.6         | 11.2         | 0.79         | 0.43        | 0.79                    |
| HOPE-2                           | 49 / 2758          | 36 / 2764          | -6.7        | 21.2         | -1.50        | 0.14        | 1.37                    |
| SEARCH                           | 84 / 6033          | 84 / 6031          | -0.3        | 41.9         | -0.05        | 0.96        | 1.01                    |
| <b>Subtotal</b>                  | <b>212 / 23466</b> | <b>196 / 23501</b> | <b>-8.5</b> | <b>101.8</b> | <b>-0.85</b> | <b>0.40</b> | <b>1.09 (0.90-1.32)</b> |
| <b>Total</b>                     | <b>221 / 24798</b> | <b>208 / 24821</b> | <b>-7.1</b> | <b>107.1</b> | <b>-0.69</b> | <b>0.49</b> | <b>1.07 (0.88-1.29)</b> |
| <b>Total (except AFPPS)</b>      | <b>218 / 24282</b> | <b>204 / 24316</b> | <b>-7.7</b> | <b>105.3</b> | <b>-0.75</b> | <b>0.45</b> | <b>1.08 (0.89-1.30)</b> |

Heterogeneity (AFPPS vs rest):  $\chi^2_1 = 0.28$   $p=0.6$



## webtable 5: Effects of folic acid allocation on prostate cancer incidence, by trial

|                                  | Folic acid<br>events | Control<br>events  | O-E          | Var          | Z-value      | p-value     | RR (95% CI)             |
|----------------------------------|----------------------|--------------------|--------------|--------------|--------------|-------------|-------------------------|
| <b>Colorectal Adenoma trials</b> |                      |                    |              |              |              |             |                         |
| HARVARD                          | 1 / 470              | 1 / 469            | -0.1         | 0.5          | -0.14        | 0.89        | 1.23                    |
| ukCAP                            | 5 / 346              | 6 / 346            | 0.5          | 2.7          | 0.30         | 0.76        | 0.83                    |
| AFPPS                            | 24 / 516             | 9 / 505            | -7.2         | 8.2          | -2.50        | 0.01        | 2.39                    |
| <b>Subtotal</b>                  | <b>30 / 1332</b>     | <b>16 / 1320</b>   | <b>-6.8</b>  | <b>11.5</b>  | <b>-2.00</b> | <b>0.05</b> | <b>1.80 (1.01-3.22)</b> |
| <b>Vascular disease trials</b>   |                      |                    |              |              |              |             |                         |
| VITRO                            | 1 / 353              | 0 / 348            | -0.5         | 0.3          | -1.00        | 0.32        | 7.39                    |
| HOST                             | 7 / 1032             | 7 / 1024           | -0.2         | 3.5          | -0.09        | 0.93        | 1.05                    |
| WENBIT                           | 21 / 1540            | 16 / 1550          | -2.8         | 9.2          | -0.91        | 0.36        | 1.35                    |
| NORVIT                           | 15 / 1872            | 18 / 1877          | 1.8          | 8.2          | 0.63         | 0.53        | 0.80                    |
| SU-FOL-OM3                       | 27 / 1242            | 23 / 1259          | -1.6         | 12.5         | -0.45        | 0.65        | 1.14                    |
| VISP                             | 17 / 1827            | 11 / 1853          | -3.0         | 7.0          | -1.10        | 0.26        | 1.54                    |
| VITATOPS                         | 14 / 4088            | 25 / 4074          | 5.8          | 9.7          | 1.84         | 0.07        | 0.55                    |
| HOPE-2                           | 69 / 2758            | 58 / 2764          | -6.2         | 31.7         | -1.10        | 0.27        | 1.22                    |
| SEARCH                           | 150 / 6033           | 131 / 6031         | -9.6         | 70.2         | -1.10        | 0.25        | 1.15                    |
| <b>Subtotal</b>                  | <b>321 / 20745</b>   | <b>289 / 20780</b> | <b>-16.3</b> | <b>152.4</b> | <b>-1.30</b> | <b>0.19</b> | <b>1.11 (0.95-1.30)</b> |
| <b>Total</b>                     | <b>351 / 22077</b>   | <b>305 / 22100</b> | <b>-23.1</b> | <b>163.9</b> | <b>-1.80</b> | <b>0.07</b> | <b>1.15 (0.99-1.34)</b> |
| <b>Total (except AFPPS)</b>      | <b>327 / 21561</b>   | <b>296 / 21595</b> | <b>-15.9</b> | <b>155.6</b> | <b>-1.30</b> | <b>0.20</b> | <b>1.11 (0.95-1.30)</b> |

Heterogeneity (AFPPS vs rest):  $\chi^2_1 = 4.46$   $p=0.03$

**webtable 6: Effects of folic acid allocation on cancer incidence, by trial**

|                                  | Folic acid<br>events | Control<br>events   | O-E          | Var          | Z-value      | p-value     | RR (95% CI)             |
|----------------------------------|----------------------|---------------------|--------------|--------------|--------------|-------------|-------------------------|
| <b>Colorectal Adenoma trials</b> |                      |                     |              |              |              |             |                         |
| HARVARD                          | 14 / 470             | 13 / 469            | -1.2         | 6.4          | -0.46        | 0.65        | 1.20                    |
| ukCAP                            | 24 / 346             | 25 / 346            | 0.7          | 12.2         | 0.20         | 0.84        | 0.94                    |
| AFPPS                            | 58 / 516             | 34 / 505            | -11.3        | 22.9         | -2.30        | 0.02        | 1.63                    |
| <b>Subtotal</b>                  | <b>96 / 1332</b>     | <b>72 / 1320</b>    | <b>-11.7</b> | <b>41.6</b>  | <b>-1.80</b> | <b>0.07</b> | <b>1.33 (0.98-1.80)</b> |
| <b>Vascular disease trials</b>   |                      |                     |              |              |              |             |                         |
| VITRO                            | 12 / 353             | 7 / 348             | -3.3         | 4.3          | -1.60        | 0.11        | 2.15                    |
| HOST                             | 65 / 1032            | 72 / 1024           | 2.0          | 34.1         | 0.34         | 0.74        | 0.94                    |
| WENBIT                           | 81 / 1540            | 63 / 1550           | -10.1        | 35.9         | -1.70        | 0.09        | 1.32                    |
| NORVIT                           | 82 / 1872            | 67 / 1877           | -5.7         | 37.2         | -0.94        | 0.35        | 1.17                    |
| SU-FOL-OM3                       | 93 / 1242            | 78 / 1259           | -7.3         | 42.7         | -1.10        | 0.26        | 1.19                    |
| VISP                             | 92 / 1827            | 95 / 1853           | 1.4          | 46.7         | 0.20         | 0.84        | 0.97                    |
| VITATOPS                         | 162 / 4088           | 183 / 4074          | 12.0         | 86.1         | 1.29         | 0.20        | 0.87                    |
| WAFACS                           | 201 / 2721           | 213 / 2721          | 6.9          | 103.5        | 0.68         | 0.50        | 0.94                    |
| HOPE-2                           | 342 / 2758           | 320 / 2764          | -13.6        | 165.3        | -1.10        | 0.29        | 1.09                    |
| SEARCH                           | 678 / 6033           | 639 / 6031          | -20.6        | 329.1        | -1.10        | 0.26        | 1.06                    |
| <b>Subtotal</b>                  | <b>1808 / 23466</b>  | <b>1737 / 23501</b> | <b>-38.3</b> | <b>884.9</b> | <b>-1.30</b> | <b>0.20</b> | <b>1.04 (0.98-1.12)</b> |
| <b>Total</b>                     | <b>1904 / 24798</b>  | <b>1809 / 24821</b> | <b>-50.0</b> | <b>926.5</b> | <b>-1.60</b> | <b>0.10</b> | <b>1.06 (0.99-1.13)</b> |
| <b>Total (except AFPPS)</b>      | <b>1846 / 24282</b>  | <b>1775 / 24316</b> | <b>-39.2</b> | <b>903.5</b> | <b>-1.30</b> | <b>0.19</b> | <b>1.04 (0.98-1.11)</b> |

Heterogeneity (AFPPS vs rest):  $\chi^2_1 = 2.24$  p=0.1
